# Supplementary material for: Dynamical network analysis reveals key microRNAs in progressive stages of lung cancer
Source: PLOS journal article supplement (doi:10.1371/journal.pcbi.1007793), 2020-05-19
Supplement: S12 (10.1371/journal.pcbi.1007793.s012) [file journal.pcbi.1007793.s012]

**S3 Table. The number of differential expression (DE) gene.**

|           | DE lncRNAs |    |      | DE microRNAs |    |      | DE mRNAs |      |      |
|-----------|------------|----|------|--------------|----|------|----------|------|------|
|           | total      | up | down | total        | up | down | total    | up   | down |
| Stage I   | 104        | 56 | 48   | 112          | 24 | 88   | 1657     | 966  | 691  |
| Stage II  | 118        | 75 | 43   | 114          | 28 | 86   | 1890     | 1077 | 813  |
| Stage III | 131        | 80 | 51   | 118          | 26 | 92   | 2039     | 1159 | 880  |
| Stage IV  | 119        | 69 | 50   | 110          | 22 | 88   | 2016     | 1169 | 847  |

The threshold of the absolute value of  $\log_2$  FC ( $\log_2$  fold change) for filtering the three types of RNAs is set to be one, ensuring that their P-values are less than 0.05 in the differential expression analysis.

Fold changes greater than one correspond to up-regulated genes, while those less than minus one are associated with down-regulated genes. The rows Stages I, II, III, and IV represent the networks in the four stages of LUAD.
